# Supplementary material for: Evolution of the nonsense-mediated decay pathway is associated with decreased cytolytic immune infiltration
Source: PubMed Central journal article supplement (PMC6837539; doi:10.1371/journal.pcbi.1007467), 2019-10-28

Figure S7

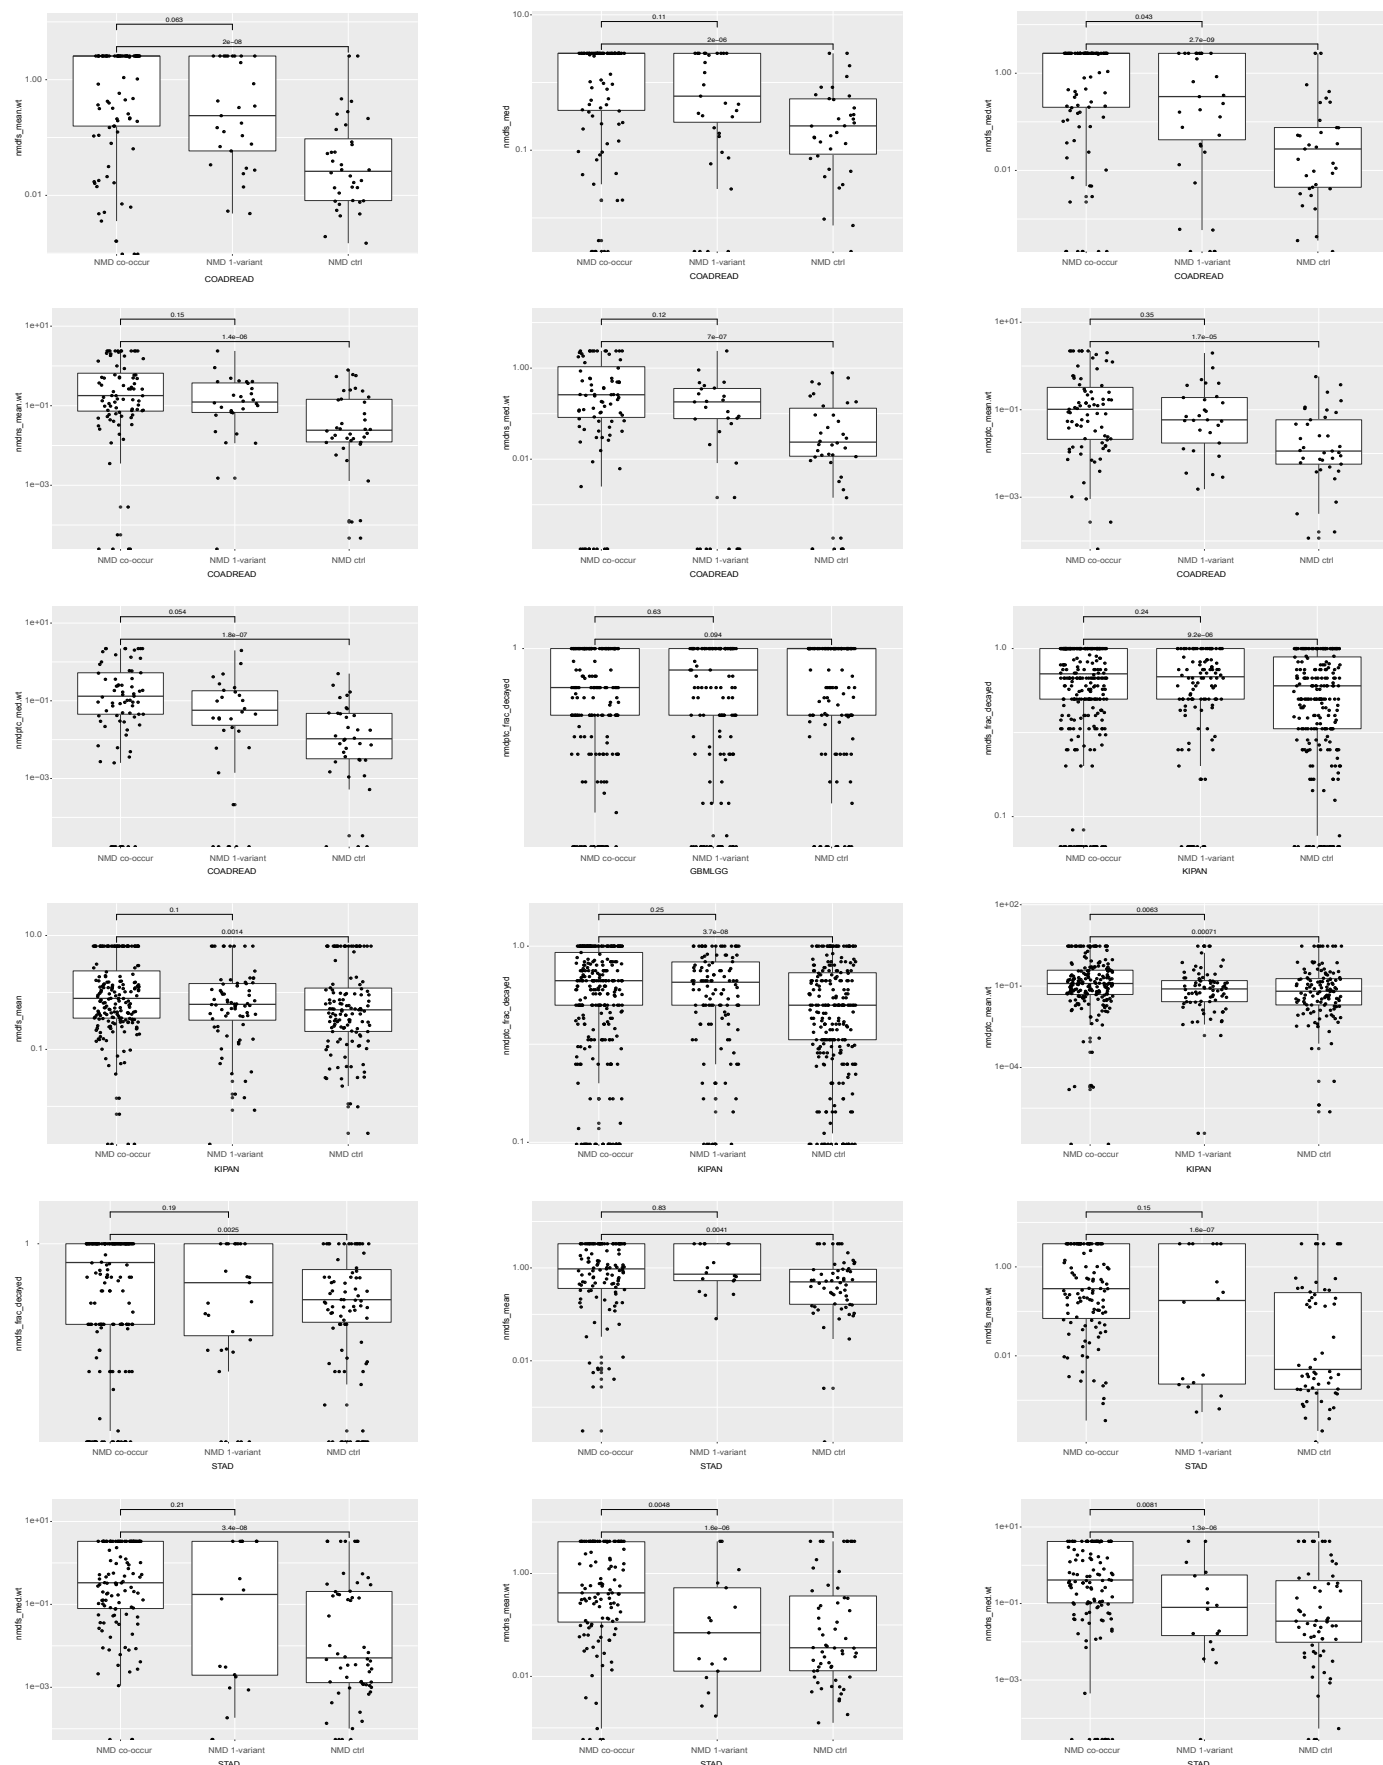

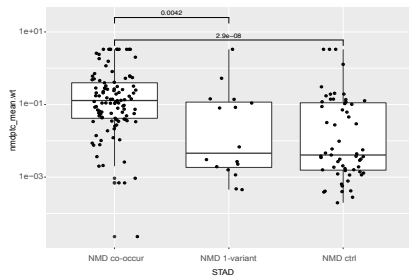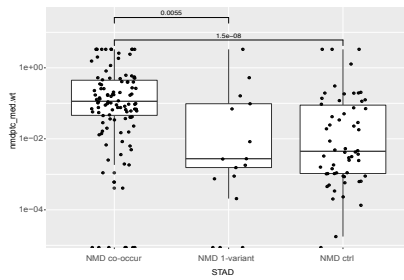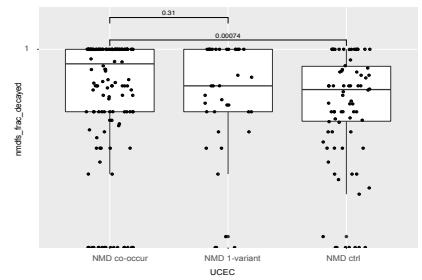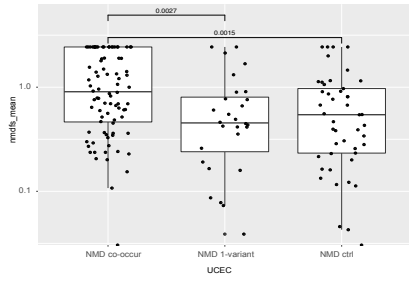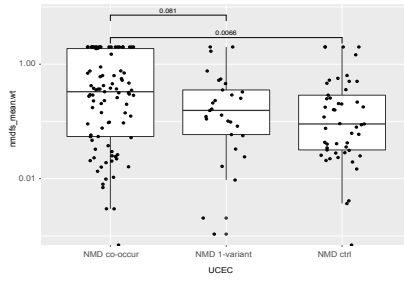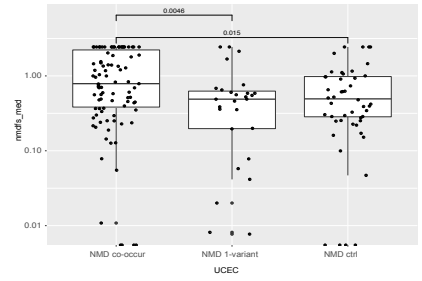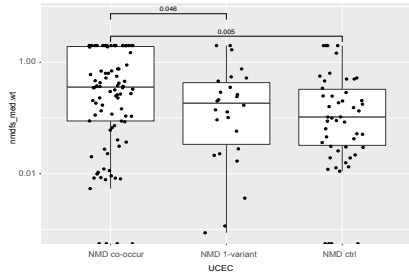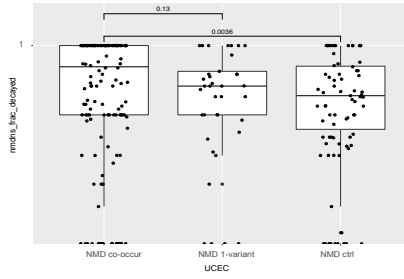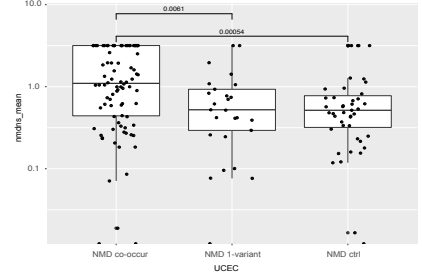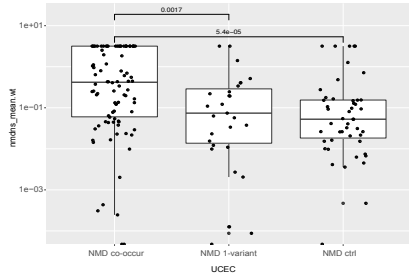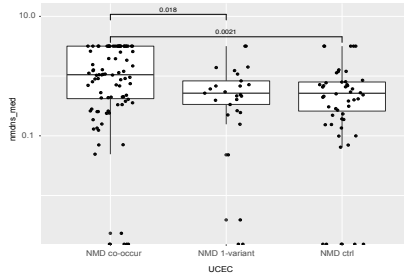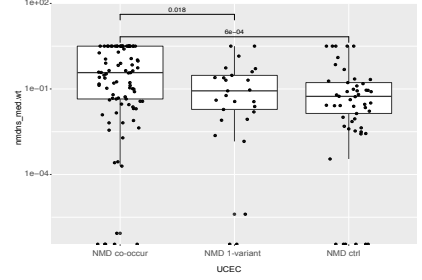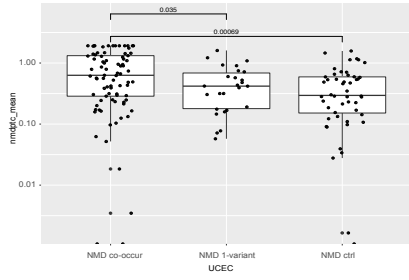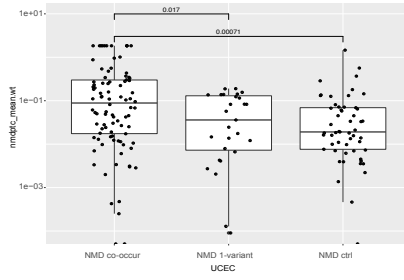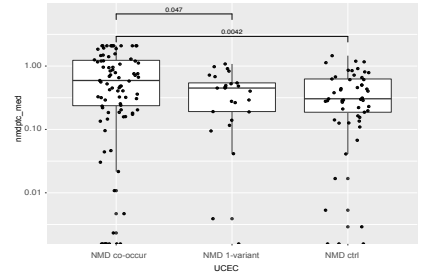

Supplement: pcbi.1007467.s009.pdf [file pcbi.1007467.s009.pdf]
